# Supplementary material
Source: Springer Nature journal article supplement (https://www.springermedizin.de/resource/supplementary/40164_2013_65_MOESM10_ESM.pdf/9687108)

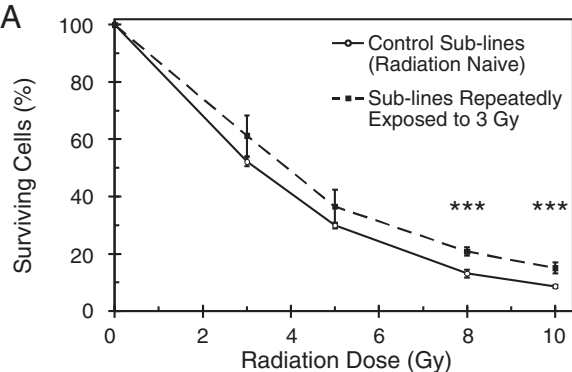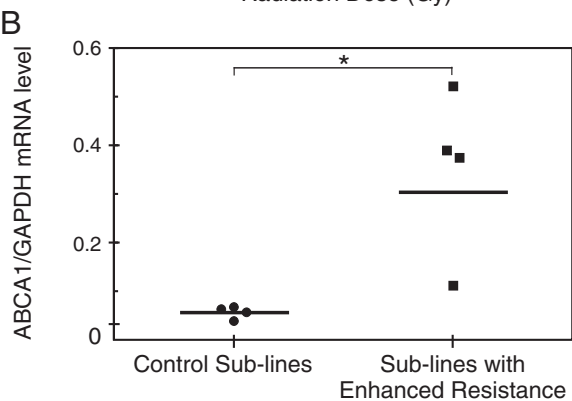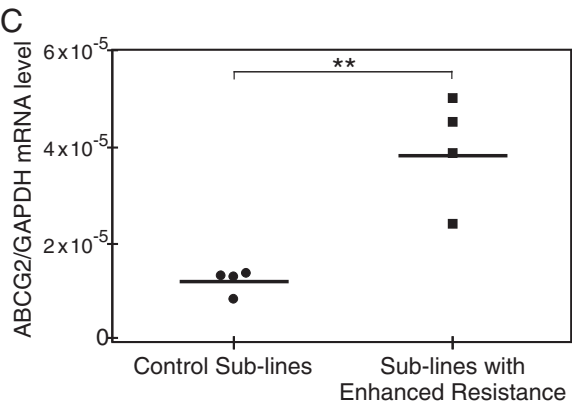

Supplement: MOESM10 [file 9687108]
